# Supplementary material for: A simple method for generating high-resolution maps of genome-wide protein binding
Source: eLife journal article supplement (doi:10.7554/elife.09225), 2015-06-16
Supplement: supp [file elife-09225-supp-v1.zip]

Archive with 4 entries (4 files):
- elife_poa_e09225_Supplementary_File_1.pdf
- elife_poa_e09225_Figure_1_figure_supplement_1.pdf
- elife_poa_e09225_Figure_3_figure_supplement_2.pdf
- elife_poa_e09225_Figure_3_figure_supplement_1.pdf
