# Supplementary material for: A simple method for generating high-resolution maps of genome-wide protein binding
Source: eLife journal article supplement (doi:10.7554/elife.09225), 2015-06-16
Supplement: supp [file elife-09225-supp-v1.zip › elife_poa_e09225_Figure_3_figure_supplement_1.pdf]

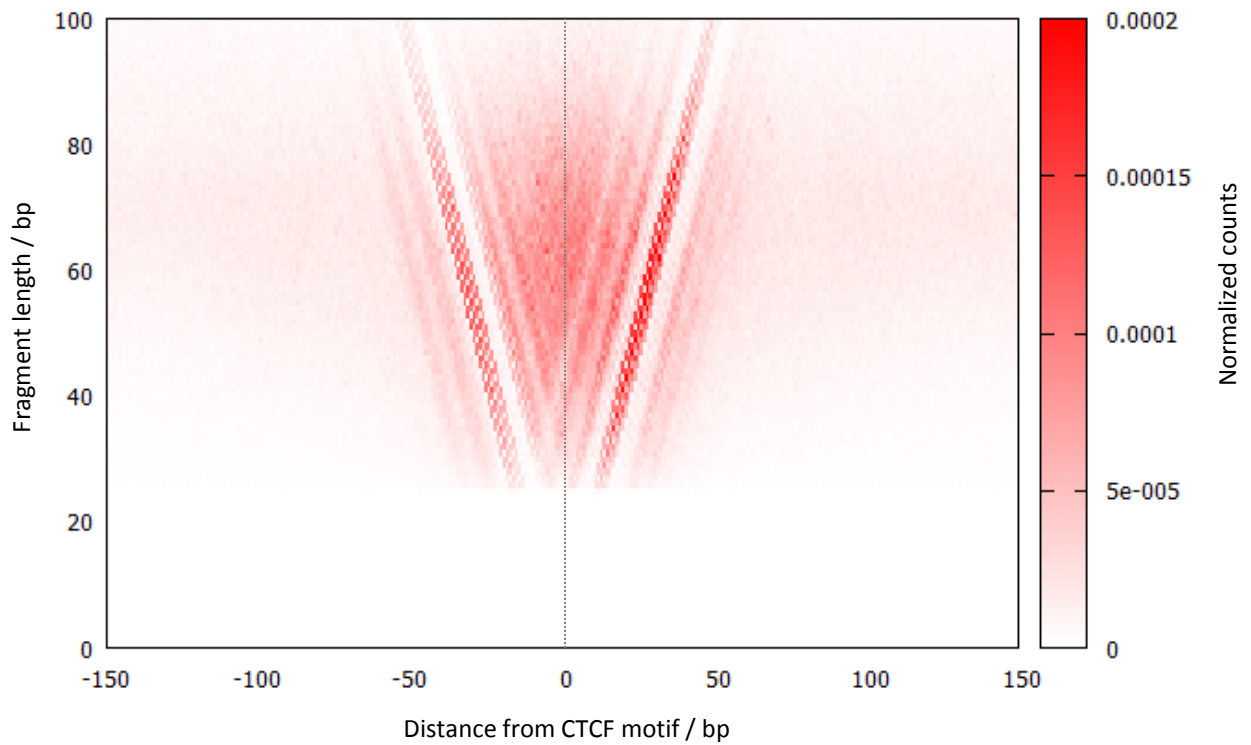

**Figure 3 – figure supplement 1 – V-plot of DNA fragments recovered by CTCF high-resolution X-ChIP-seq.**

The V-plot is a midpoint-versus-length map centered on the aligned CTCF motifs ( $n=9403$ ), where a dot is placed on a 2D map with the x-axis representing the midpoint position of each immunoprecipitated fragment and the y-axis representing the length of that DNA fragment<sup>11</sup>. Normalized counts represent the number of fragments at each pixel position relative to the total number of pixels. Note that the shorter DNA fragments are more tightly grouped and closely centered over the CTCF motif.
