# Supplementary material for: A simple method for generating high-resolution maps of genome-wide protein binding
Source: eLife journal article supplement (doi:10.7554/elife.09225), 2015-06-16
Supplement: supp [file elife-09225-supp-v1.zip › elife_poa_e09225_Figure_3_figure_supplement_2.pdf]

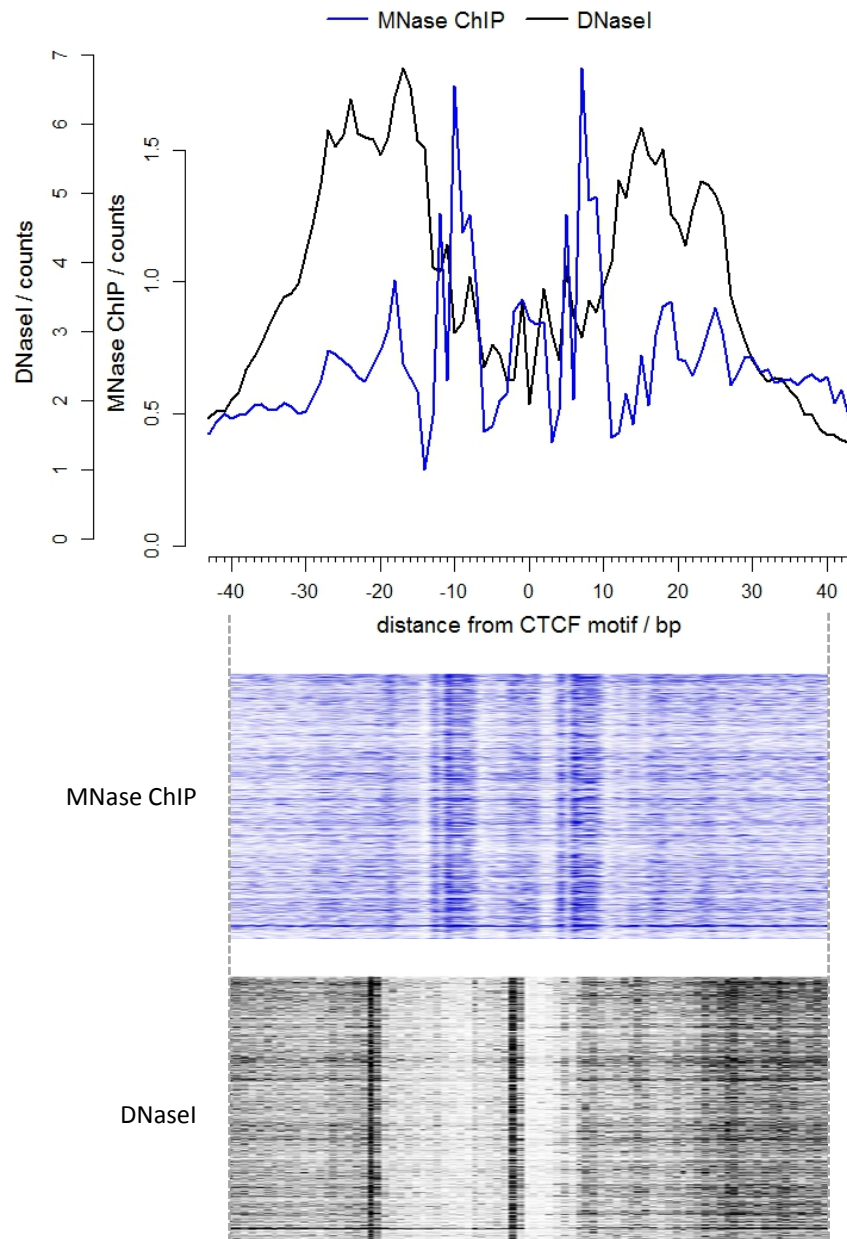

**Figure 3 – figure supplement 2 – Comparison of the ends of DNA fragments from DNase I and high-resolution X-ChIP-seq centered over the CTCF motif.**

The upper graph shows the average profile, and the heatmaps below show the signal  $\pm 40$  bp for each CTCF motif. The leftward shift of the DNase I footprint likely reflects differences in the steric interactions between CTCF and DNase I and that MNase.
